# Supplementary material for: An Intronic Heterozygous SYNE2 Splice Site Mutation: A Rare Cause for Myalgia and hyperCKemia?
Source: MDPI journal article supplement (doi:10.3390/muscles3010010), 2024-03-15
Supplement: s1 [file s1]

Case Report

# An Intronic Heterozygous *SYNE2* Splice Site Mutation: A Rare Cause for Myalgia and hyperCKemia?

Supplementary:

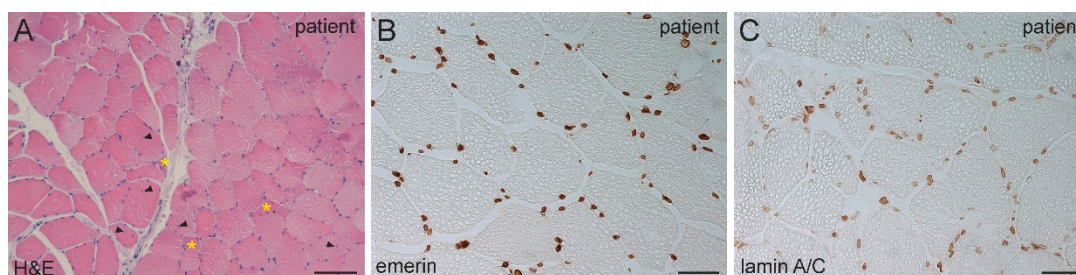

**Figure S1.** Muscle pathology of the patient. (A) Hematoxylin and eosin stain (H&E). Black arrowheads denote central nuclei in muscle fibers. Note the presence of few atrophic fibers (yellow asterisks). (B) Immunohistochemistry for emerlin. (C) Immunohistochemistry for lamin A/C. Scale bar corresponds to 100  $\mu$ m in the H&E photograph and to 50  $\mu$ m in the immunohistochemical stains.

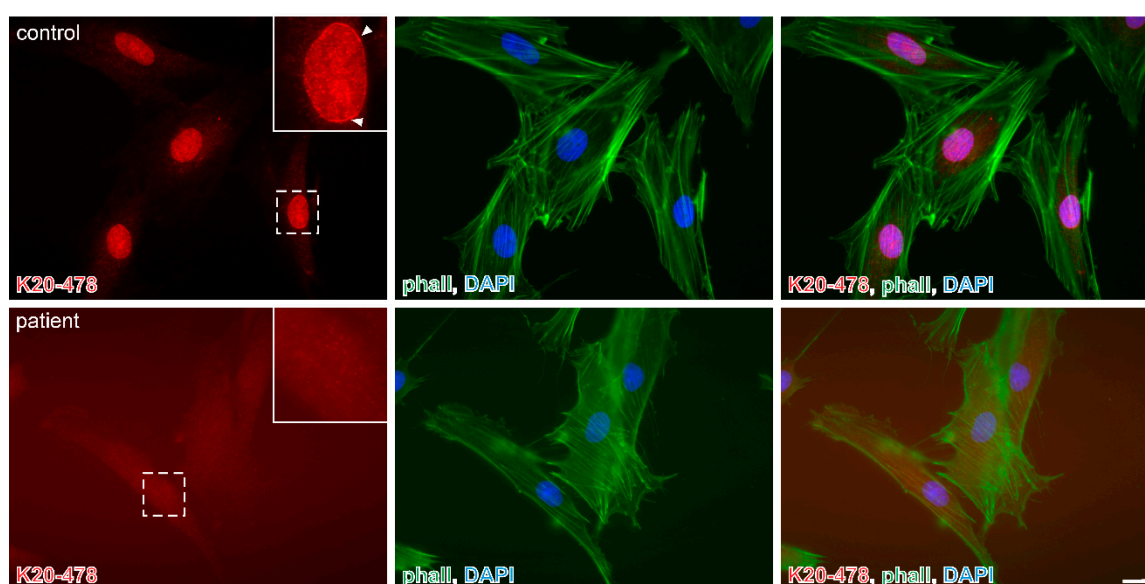

**Figure S2.** The nuclear envelope nesprin-2 giant protein localisation in *SYNE2* patient dermal fibroblast cells is compromised. Immunofluorescence examination of control and patient dermal fibroblast cells using the anti-nesprin-2 giant protein (N2G) K20-478 monoclonal antibody. Inset is higher digital magnification of dashed area. Arrowheads highlight the presence of N2G protein in control nuclei. FITC-conjugated phalloidin (phall) is used to visualise the F-actin cytoskeleton and the overall morphology of the studied cells. Nuclei are stained with DAPI. Scale bar 20  $\mu$ m.

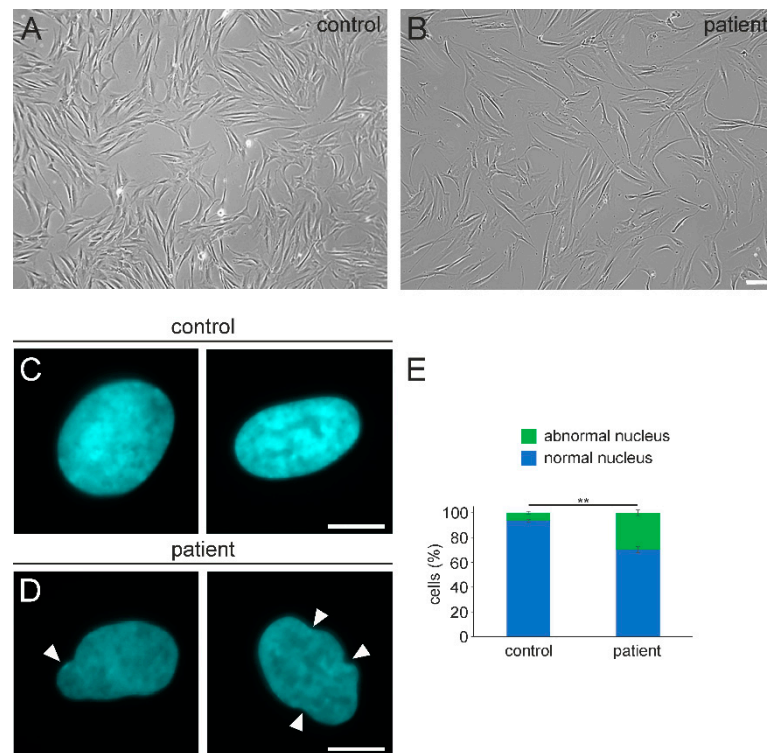

**Figure S3.** Patient dermal fibroblast cells show higher level of nuclear shape defects. **(A, B)** Phase contrast microscopy of control **(A)** and patient **(B)** dermal fibroblast cells. Scale bar 100 µm. **(C, D)** Immunofluorescence of control **(C)** and patient **(D)** cell DAPI-stained nuclei. Defects in nuclear shape in patient fibroblasts are indicated with arrowheads (panel **D**). Scale bars 10 µm. **(E)** The % of control and patient fibroblast cells with normal and abnormally shaped nuclei is indicated. The error bars denote the Standard Error of the Mean (SEM). Statistical evaluation using an unpaired Student's t-test,  $p < 0.01$  (\*\*).

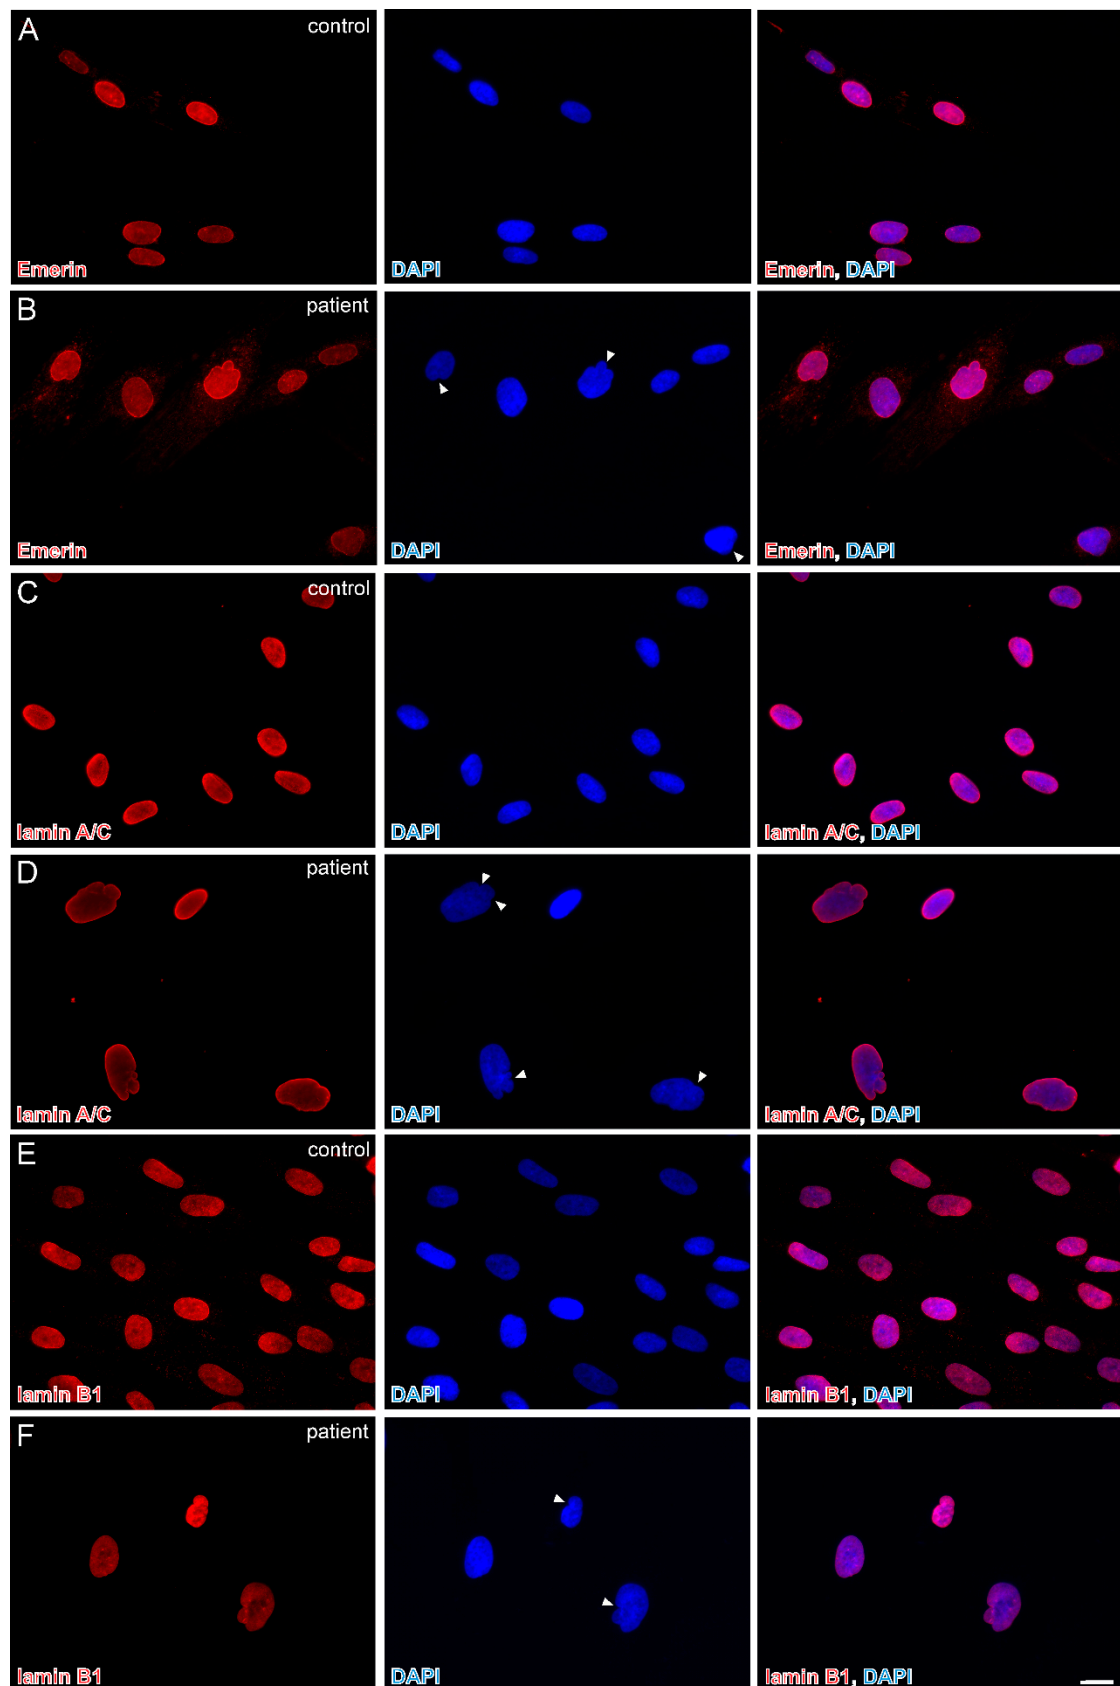

**Figure S4.** The localisation of emerlin, lamin A/C, and lamin B1 in patient dermal fibroblast cells is not compromised. Immunofluorescence analysis of control and patient dermal fibroblast cells using anti-emerlin (panels **A**, **B**), anti-lamin A/C (panels **C**, **D**) and anti-lamin B1 (panels **E**, **F**) antibodies. Note that all the antibodies yield similar staining in both control and patient cells. Irregularities in nuclear shape in patient cells are denoted with arrowheads. Nuclei are counterstained with DAPI. Scale bar 20  $\mu$ m.

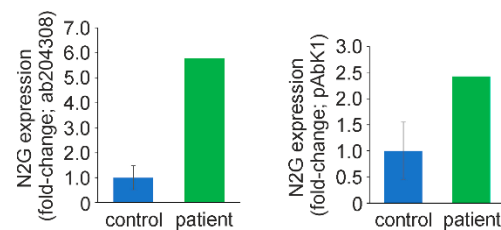

**Figure S5.** Nesprin-2 giant expression levels are increased in *SYNE2* patient fibroblast cells. Nesprin-2 giant (N2G) expression levels in control and patient cells using the ab204308 (left graph) and pAbK1 (right graph) rabbit polyclonal antibodies. Error bars for control denote the Standard Error of the Mean (SEM).

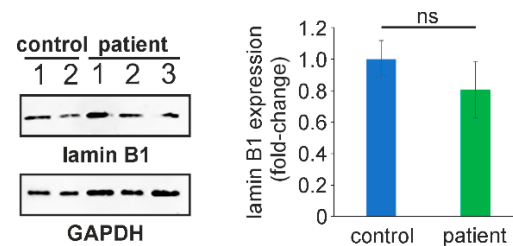

**Figure S6.** Lamin B1 expression is similar in control and patient fibroblast cells. A Western blot analysis was conducted to assess lamin B1 protein expression in control and *SYNE2* patient dermal fibroblasts. Lysate numbers highlight different technical repeats (left panel). GAPDH was used to verify equal loading of samples. The graph (right panel) illustrates that the observed changes in lamin B1 expression were not statistically significant (ns). The error bars denote the Standard Error of the Mean (SEM). Statistical analysis was performed using an unpaired Student's t-test.

**Table S1.** Primary and secondary antibodies used for immunofluorescence staining (IF) and western blotting (WB).

| Antibody                                                   | Supplier                          | Host   | Dilution                        | Application |
|------------------------------------------------------------|-----------------------------------|--------|---------------------------------|-------------|
| Lamin A/C (Jol2) monoclonal antibody                       | In-house                          | Mouse  | 1:20<br>1:40                    | IF<br>WB    |
| Nesprin 2 (K20-478) monoclonal antibody                    | In-house <sup>2</sup>             | Mouse  | 1:50                            | IF          |
| Nesprin 2 (pAbK1) polyclonal antibody                      | In-house <sup>3</sup>             | Rabbit | 1:20; 1:100 (tissue)<br>1:1,500 | IF<br>WB    |
| Nesprin 2 polyclonal antibody                              | Abcam (ab204308)                  | Rabbit | 1:10<br>1:250                   | IF<br>WB    |
| Lamin B1 polyclonal antibody                               | Abcam (ab16048)                   | Rabbit | 1:50                            | IF          |
| Emerin polyclonal antibody                                 | Abcam (ab40688)                   | Rabbit | 1:100<br>1:1,000                | IF<br>WB    |
| GAPDH monoclonal antibody                                  | Proteintech (60004-1-Ig)          | Mouse  | 1:10,000                        | WB          |
| Anti-Rabbit IgG (H+L) Secondary Antibody, Alexa Fluor™ 555 | ThermoFisher Scientific (A-21429) | Goat   | 1:400 (tissue)                  | IF          |
| Anti-Rabbit IgG (H+L) Secondary Antibody, Alexa Fluor™ 568 | ThermoFisher Scientific (A-1101)  | Goat   | 1:1,000                         | IF          |
| Anti-Mouse IgG (H+L) Secondary Antibody, Alexa Fluor™ 568  | ThermoFisher Scientific (A-1104)  | Goat   | 1:1,000                         | IF          |
| Anti-Mouse IgG (whole molecule)-Peroxidase antibody        | Sigma-Aldrich (A4416)             | Goat   | 1:10,000                        | WB          |
| Anti-Rabbit IgG (whole molecule)-Peroxidase antibody       | Sigma-Aldrich (A0545)             | Goat   | 1:5,000                         | WB          |

Table S2. Fluorescent stains and conjugates used for immunostaining.

| Fluorescent stain | Supplier              | Concentration | Application |
|-------------------|-----------------------|---------------|-------------|
| Phalloidin-FITC   | Tocris Bioscience     | 20 ng/ml      | IF          |
| DAPI              | Sigma-Aldrich (D9542) | 2 µg/ml       | IF          |
